# Supplementary material for: Cationic first-row transition metal saccharinate complexes with tris(2-pyridylmethyl)amine: synthesis, structures and anticancer studies
Source: Royal Society of Chemistry journal article supplement (doi:10.1039/d4dt02258k), 2024-11-08
Supplement: d4dt02258k1.pdf [file d4dt02258k1.pdf]

## Electronic Supplementary Information (ESI)

### **Cationic first-row transition metal saccharinate complexes with tris(2-pyridylmethyl)amine: Synthesis, structures and anticancer studies**

Ceyda Içsel <sup>a,\*</sup>, Şeyma Aydınlik <sup>b</sup>, Muhittin Aygun <sup>c</sup>, Veysel T. Yılmaz <sup>a</sup>

<sup>a</sup> Department of Chemistry, Faculty of Science, Karadeniz Technical University, 61080 Trabzon, Turkey

<sup>b</sup> TUBITAK Marmara Research Center, Climate and Life Sciences, Biotechnology Research Group, 41470 Gebze, Kocaeli, Turkey

<sup>c</sup> Department of Physics, Faculty of Sciences, Dokuz Eylül University, 35210 Izmir, Turkey

Corresponding Author:

Assoc. Prof. Dr. Ceyda Içsel

Department of Chemistry

Karadeniz Technical University

61080 Trabzon, Turkey

E-mail address: cydyilmaz@ktu.edu.tr (C. Içsel)

**Table S1** Crystallographic data and structure refinement for **Fe**, **Ni** and **Cu**

|                                                | <b>Fe</b>                                                                                                      | <b>Ni</b>                                                                       | <b>Cu</b>                                                                      |
|------------------------------------------------|----------------------------------------------------------------------------------------------------------------|---------------------------------------------------------------------------------|--------------------------------------------------------------------------------|
| Empirical formula                              | C <sub>50</sub> H <sub>50</sub> Cl <sub>2</sub> Fe <sub>2</sub> N <sub>10</sub> O <sub>10</sub> S <sub>2</sub> | C <sub>32</sub> H <sub>34</sub> N <sub>6</sub> NiO <sub>10</sub> S <sub>2</sub> | C <sub>32</sub> H <sub>26</sub> CuN <sub>6</sub> O <sub>6</sub> S <sub>2</sub> |
| Formula weight                                 | 1197.72                                                                                                        | 785.48                                                                          | 718.25                                                                         |
| Crystal system                                 | Triclinic                                                                                                      | Monoclinic                                                                      | Triclinic                                                                      |
| Space group                                    | <i>P</i> $\bar{1}$                                                                                             | <i>P</i> 2 <sub>1</sub>                                                         | <i>P</i> $\bar{1}$                                                             |
| <i>a</i> (Å)                                   | 18.776(8)                                                                                                      | 10.148(2)                                                                       | 10.5153(9)                                                                     |
| <i>b</i> (Å)                                   | 19.465(7)                                                                                                      | 16.206(3)                                                                       | 12.5550(11)                                                                    |
| <i>c</i> (Å)                                   | 19.694(6)                                                                                                      | 10.515(2)                                                                       | 13.0375(14)                                                                    |
| $\alpha$ (°)                                   | 99.02(3)                                                                                                       | 90                                                                              | 62.831(10)                                                                     |
| $\beta$ (°)                                    | 112.39(3)                                                                                                      | 94.258(16)                                                                      | 80.017(8)                                                                      |
| $\gamma$ (°)                                   | 116.69(4)                                                                                                      | 90                                                                              | 84.164 (7)                                                                     |
| <i>V</i> (Å <sup>3</sup> )                     | 5457(4)                                                                                                        | 1724.5(5)                                                                       | 1507.6 (3)                                                                     |
| <i>T</i> (K)                                   | 295(2)                                                                                                         | 295(2)                                                                          | 295(2)                                                                         |
| <i>Z</i>                                       | 4                                                                                                              | 2                                                                               | 2                                                                              |
| $\rho_{\text{calc}}$ (g cm <sup>-3</sup> )     | 1.458                                                                                                          | 1.513                                                                           | 1.582                                                                          |
| $\mu$ (mm <sup>-1</sup> )                      | 0.772                                                                                                          | 0.75                                                                            | 0.921                                                                          |
| <i>F</i> (000)                                 | 2472                                                                                                           | 816                                                                             | 738                                                                            |
| $\theta$ (°)                                   | 3.061–25.105                                                                                                   | 2.971–25.027                                                                    | 3.182–25.027                                                                   |
| Collected refls                                | 32405                                                                                                          | 6532                                                                            | 8356                                                                           |
| Data/parameters                                | 10907/897                                                                                                      | 4420/470                                                                        | 5295/424                                                                       |
| Goodness-of-fit                                | 0.974                                                                                                          | 0.991                                                                           | 1.031                                                                          |
| <i>R</i> <sub>1</sub> [ <i>I</i> >2 $\sigma$ ] | 0.124                                                                                                          | 0.052                                                                           | 0.056                                                                          |
| <i>wR</i> <sub>2</sub>                         | 0.384                                                                                                          | 0.084                                                                           | 0.112                                                                          |

**Table S2** Hydrogen bond geometry (Å, °) in **Fe** and **Ni**<sup>a</sup>

| D—H...A                       | D—H (Å) | H...A (Å) | D...A (Å)  | D—H...A (°) |
|-------------------------------|---------|-----------|------------|-------------|
| <b>Fe</b>                     |         |           |            |             |
| O1W—H1WA...O2                 | 0.85    | 2.19      | 2.78 (3)   | 127         |
| O1W—H1WB...O2W                | 0.85    | 2.09      | 2.80 (3)   | 141         |
| O2W—H2WA...O4W <sup>i</sup>   | 0.85    | 2.39      | 2.84 (3)   | 114         |
| O2W—H2WB...O7 <sup>ii</sup>   | 0.85    | 2.16      | 2.93 (3)   | 149         |
| O3W—H3WA...O5                 | 0.85    | 2.15      | 2.80 (3)   | 133         |
| O3W—H3WB...O4W                | 0.85    | 1.98      | 2.80 (3)   | 162         |
| O4W—H4WA...O2W <sup>i</sup>   | 0.85    | 2.32      | 2.84 (3)   | 120         |
| O4W—H4WB...O11 <sup>iii</sup> | 0.85    | 2.58      | 2.95 (3)   | 107         |
| O5W—H5WA...O13                | 0.85    | 2.26      | 2.93 (3)   | 135         |
| O5W—H5WB...O3W                | 0.85    | 1.94      | 2.72 (3)   | 154         |
| O6W—H6WA...O11                | 0.85    | 2.53      | 3.21 (3)   | 138         |
| O6W—H6WB...N5 <sup>iv</sup>   | 0.85    | 2.31      | 3.02 (3)   | 141         |
| <b>Ni</b>                     |         |           |            |             |
| O1W—H1WA...N5                 | 0.85    | 1.87      | 2.691 (8)  | 161         |
| O1W—H1WB...O5                 | 0.85    | 1.94      | 2.785 (7)  | 173         |
| O2W—H2WA...O3W                | 0.85    | 1.86      | 2.706 (10) | 170         |
| O2W—H2WB...N6                 | 0.85    | 2.00      | 2.818 (9)  | 162         |
| O3W—H3WA...O4 <sup>v</sup>    | 0.85    | 1.97      | 2.812 (10) | 174         |
| O3W—H3WB...O1                 | 0.85    | 2.05      | 2.867 (9)  | 162         |
| O4W—H4WA...O1 <sup>vi</sup>   | 0.85    | 2.30      | 2.862 (11) | 124         |
| O4W—H4WB...O4                 | 0.85    | 2.08      | 2.865 (10) | 153         |

<sup>a</sup> Symmetry codes: (i)  $-x+1, -y, -z+1$ ; (ii)  $x+1, y, z$ ; (iii)  $-x+1, -y+1, -z+1$ ; (iv)  $x, y+1, z$ ; (v)  $-x+1, y-1/2, -z+2$ ; (vi)  $-x+1, y+1/2, -z+2$ .

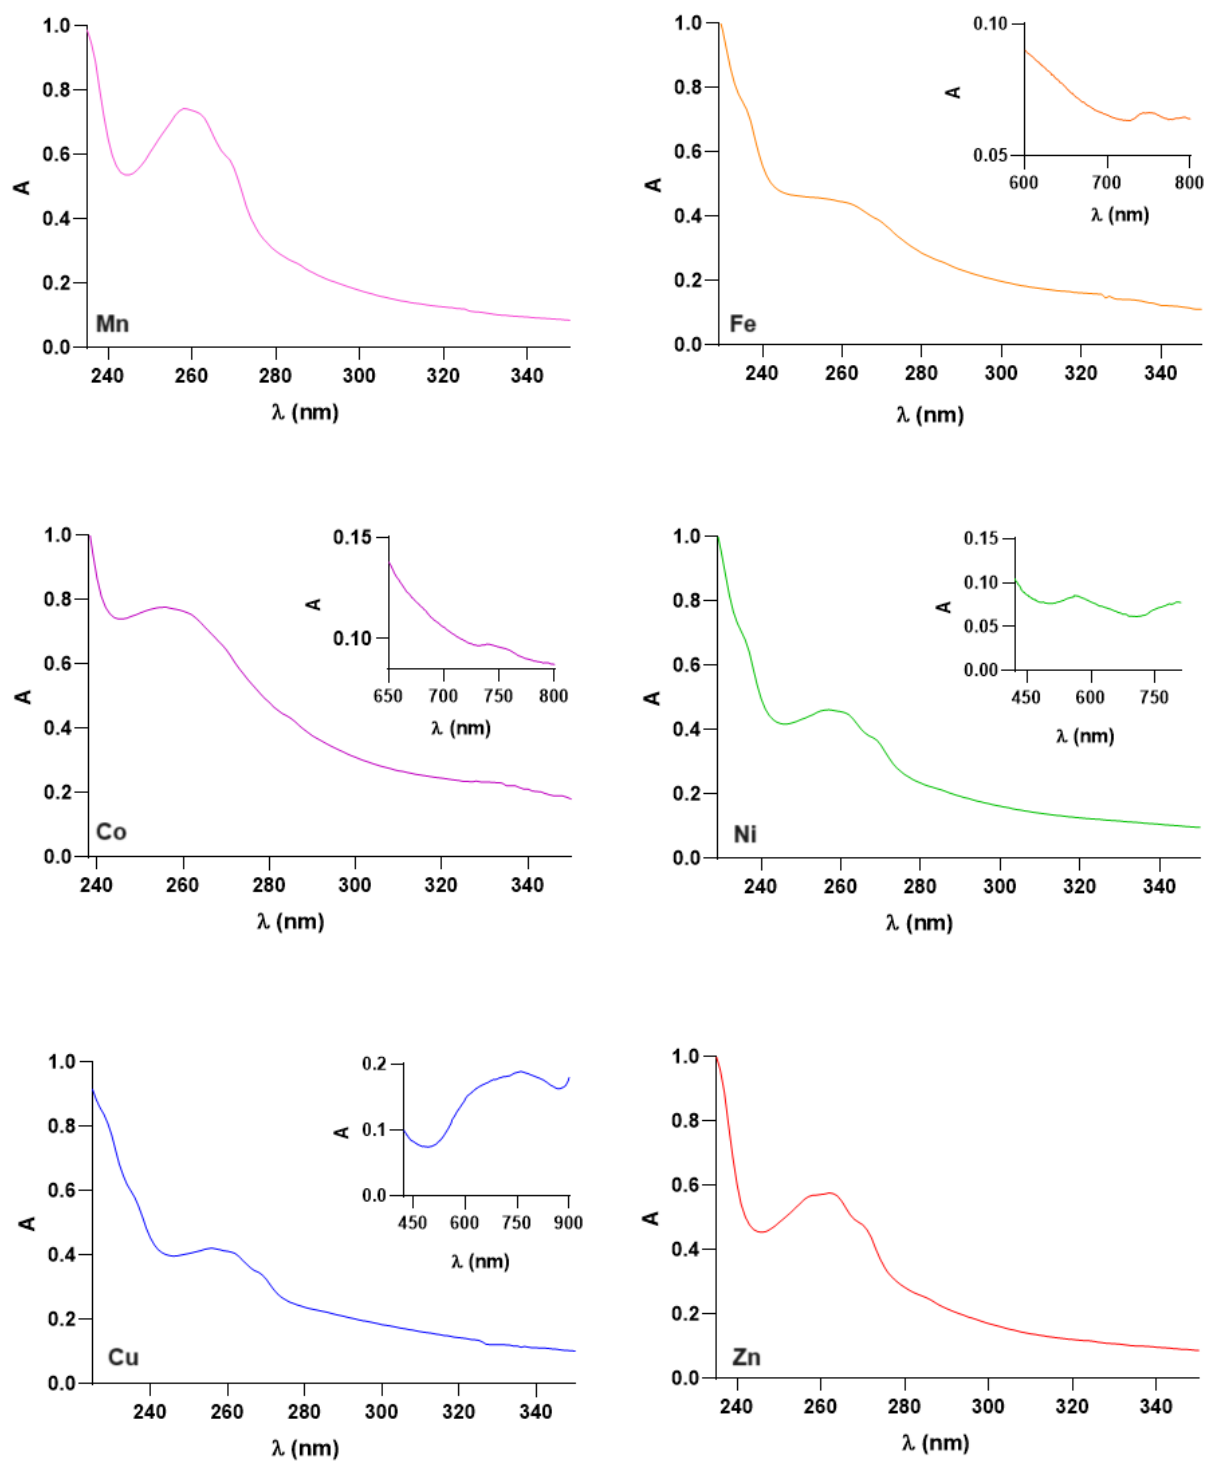

**Fig. S1** UV-Vis spectra of metal sac complexes of tpma in MeOH (10 μM).

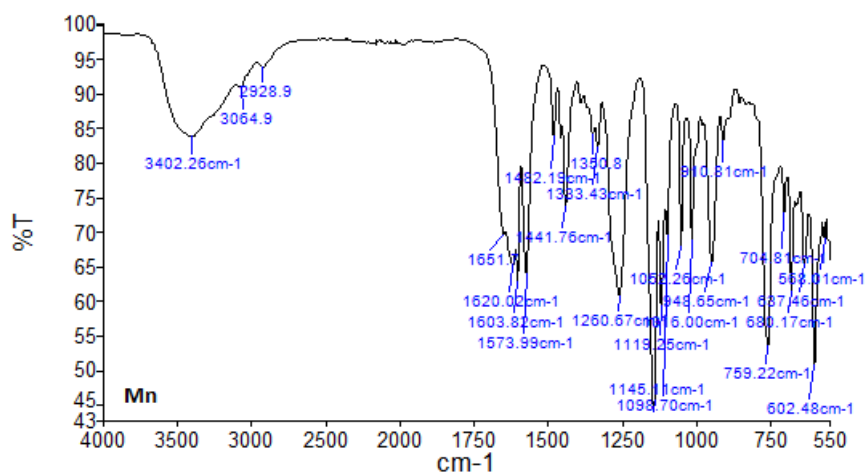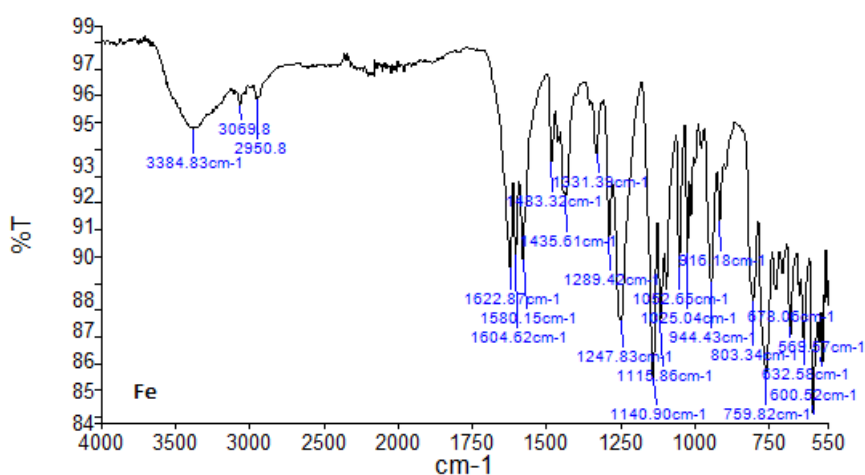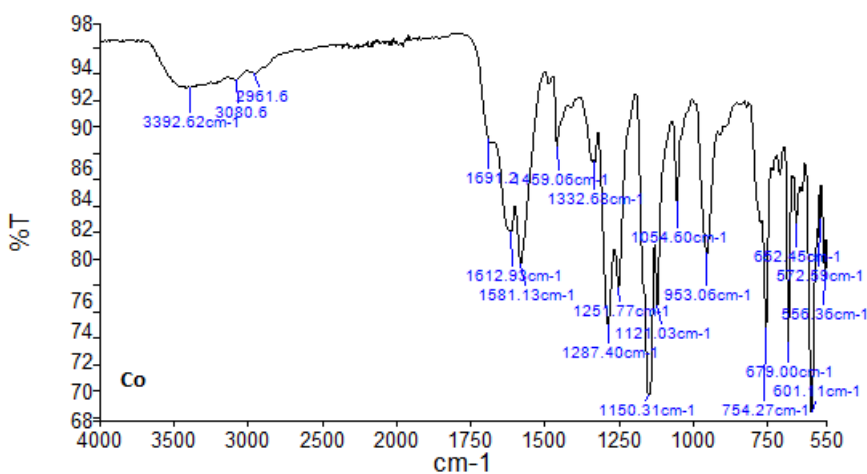

**Fig. S2 continued**

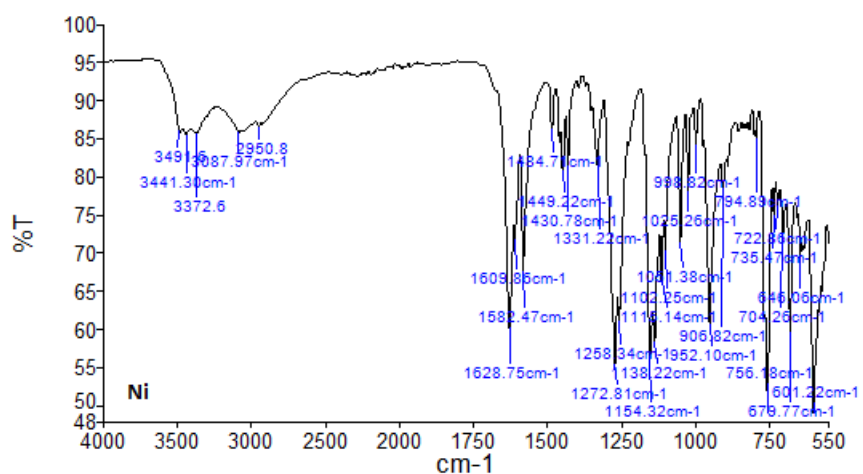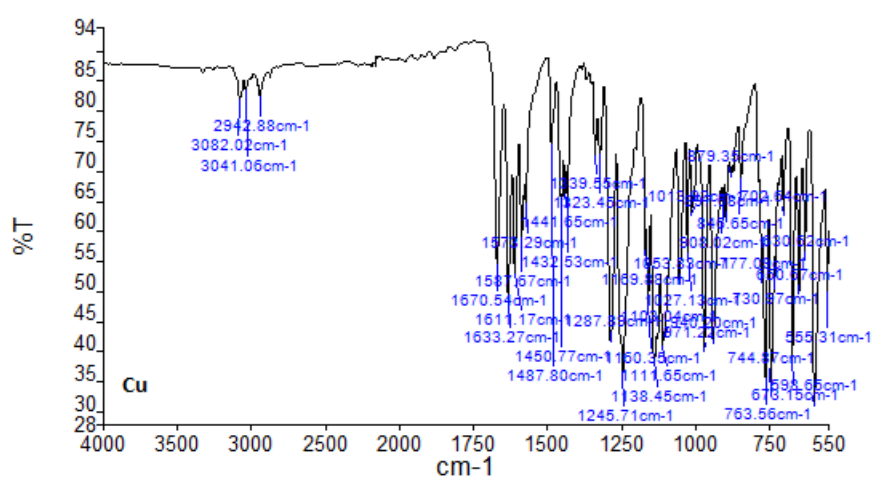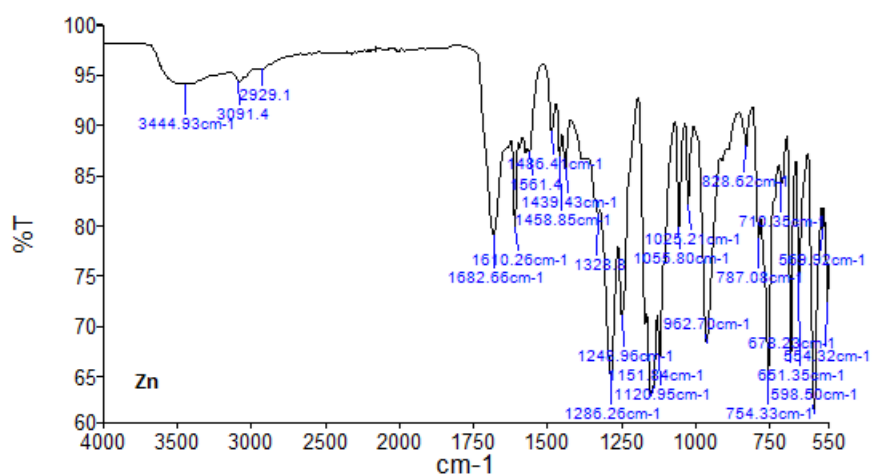

**Fig. S2** IR spectra of metal sac complexes of tpma.

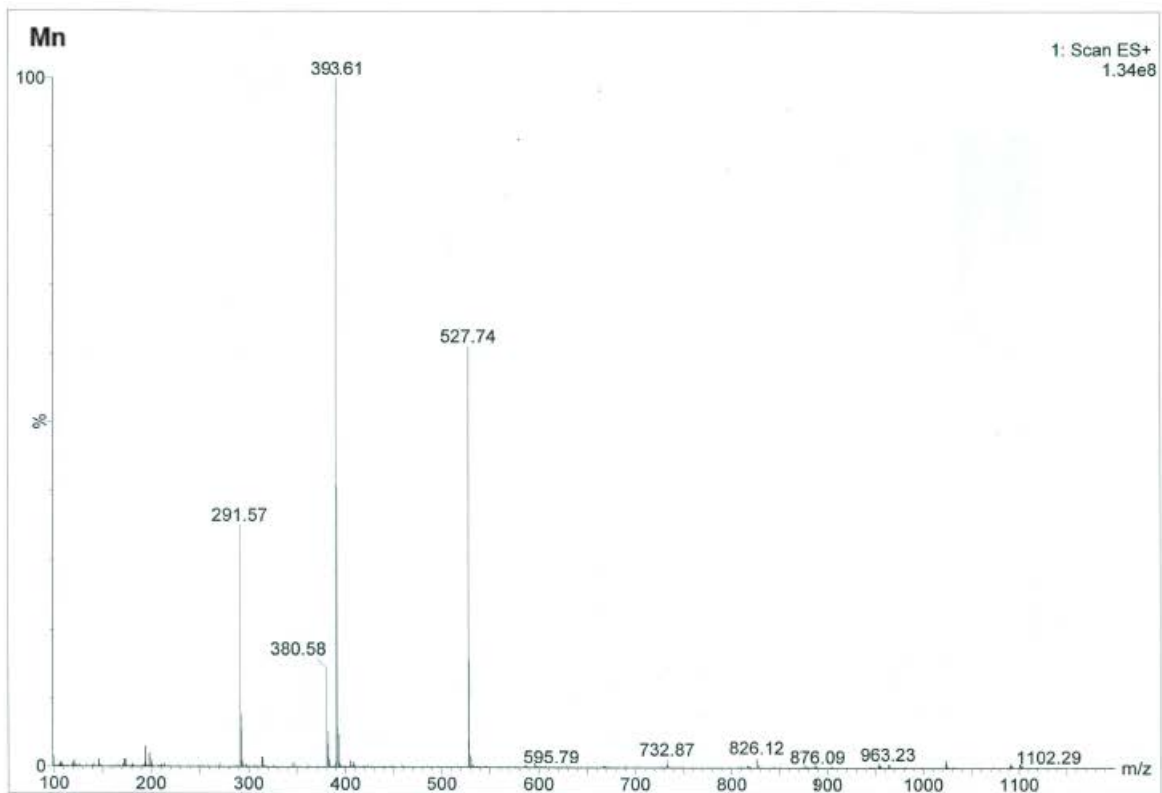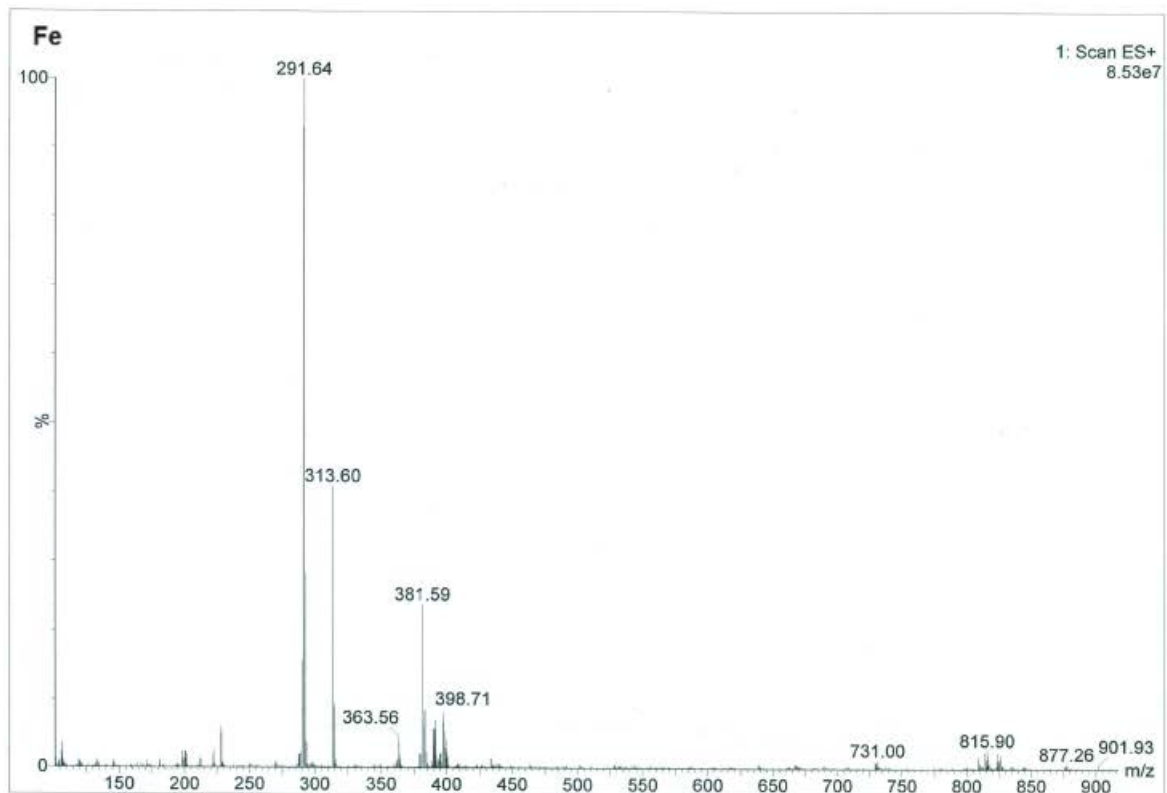

**Fig. S3** continued

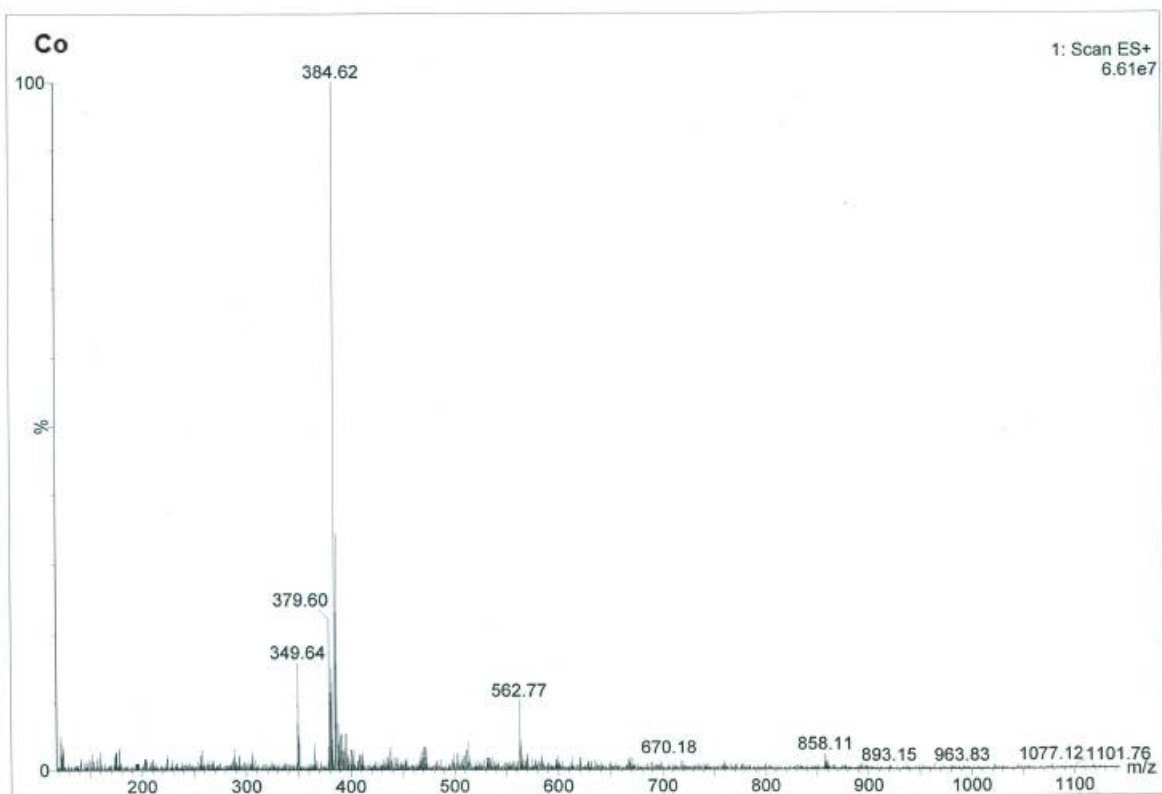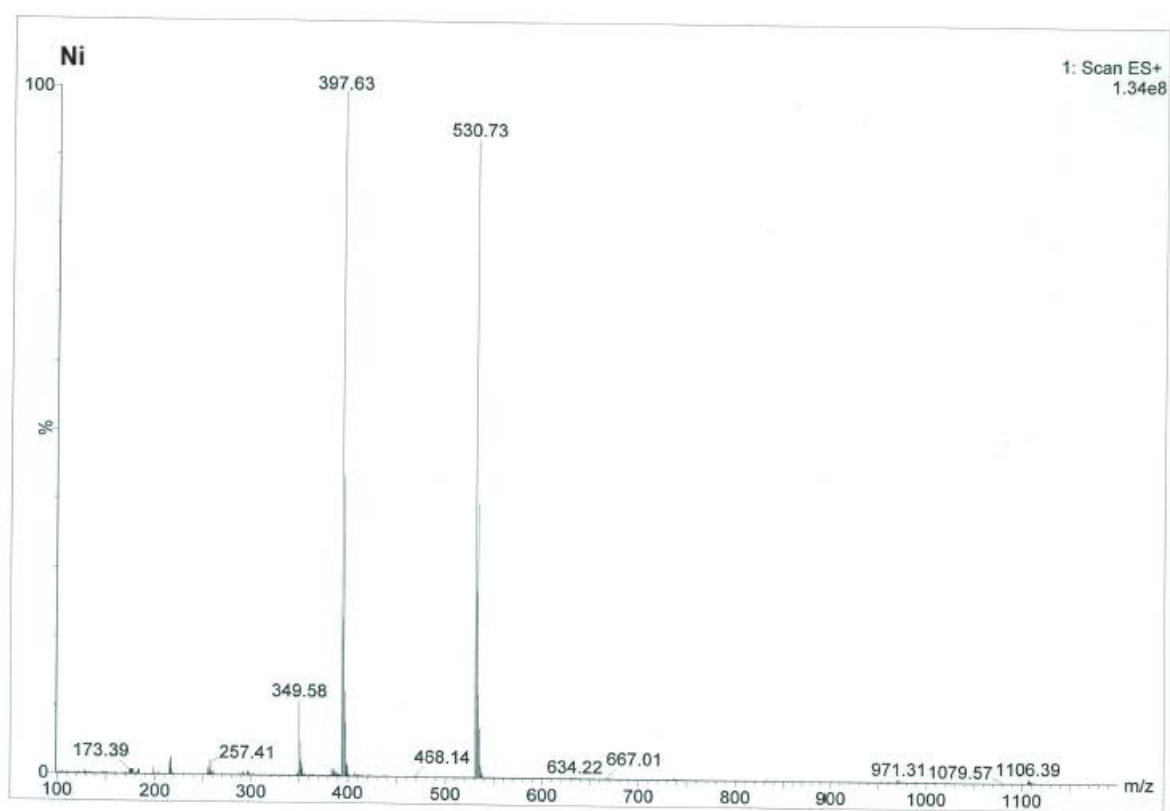

**Fig. S3** continued



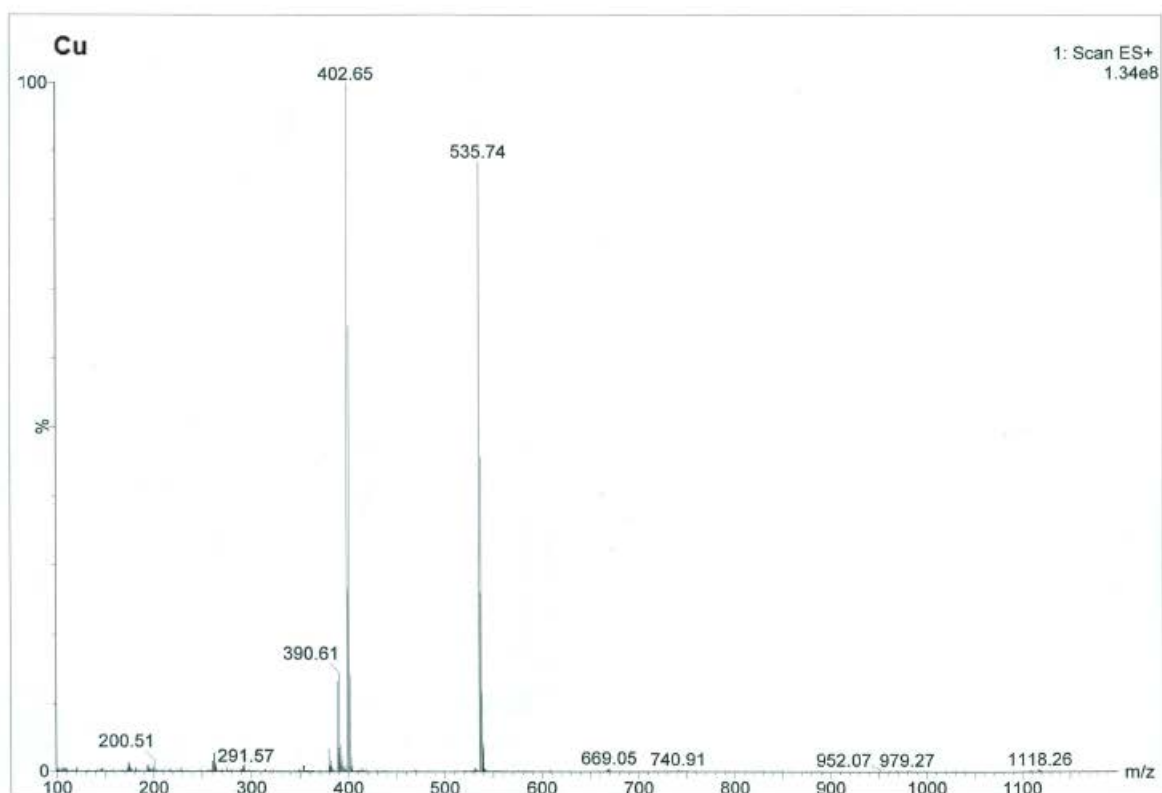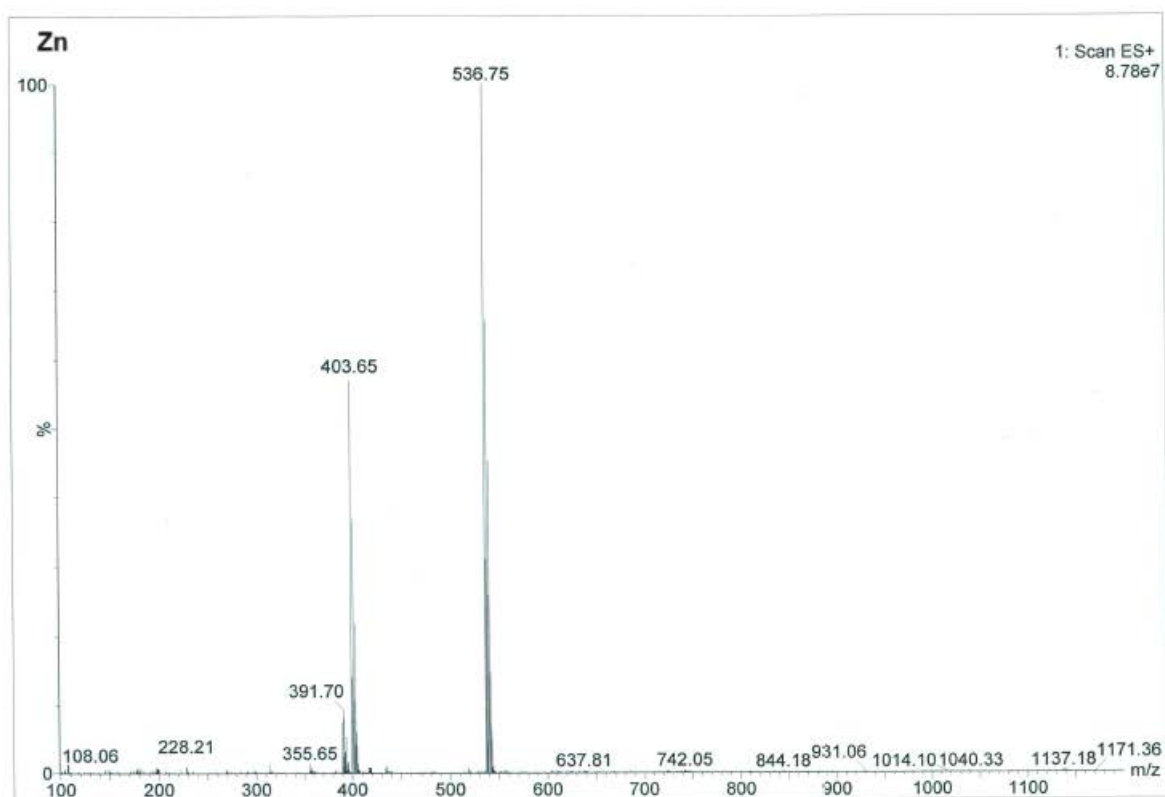

**Fig. S3** ESI-MS spectra of metal sac complexes of tpma.

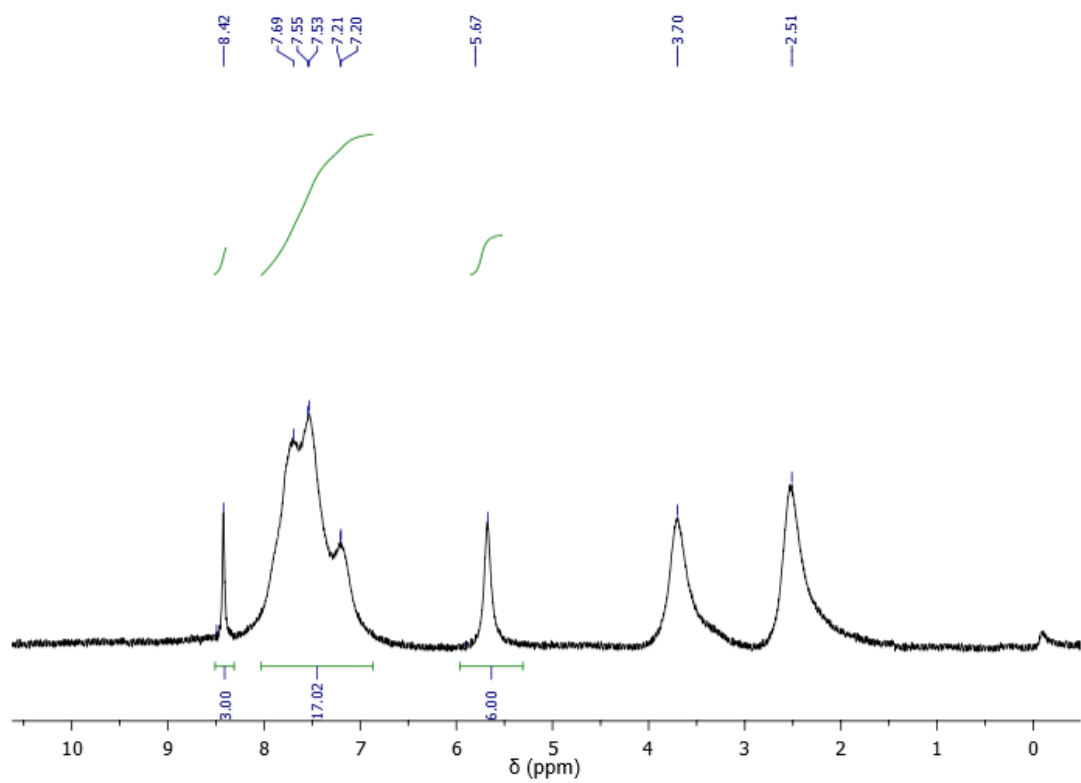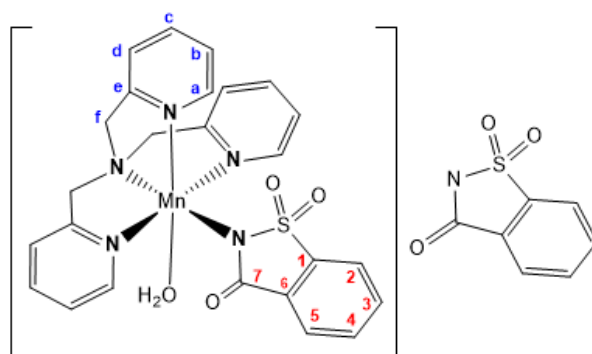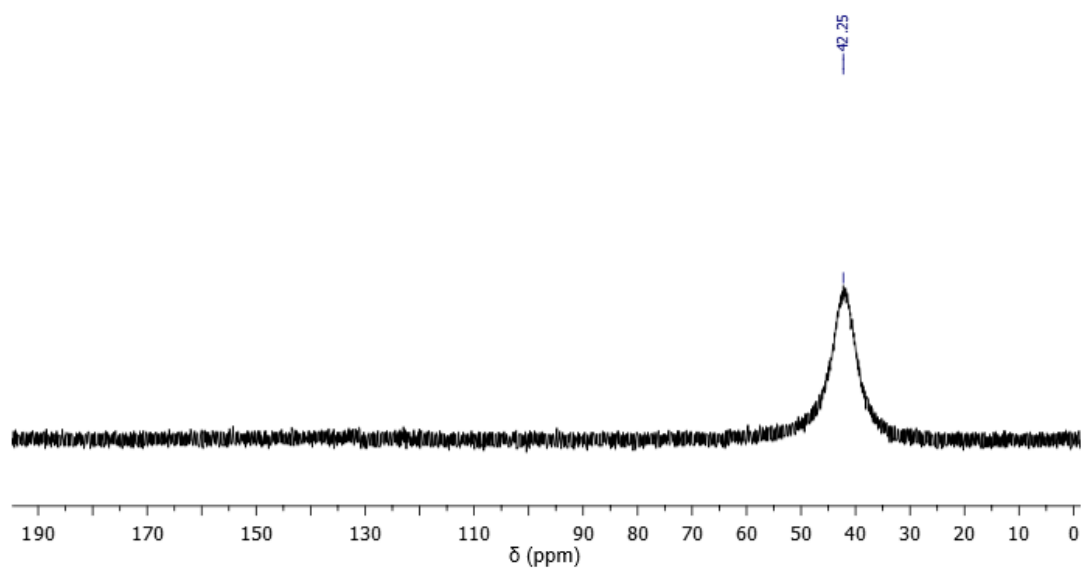

Fig. S4 continued

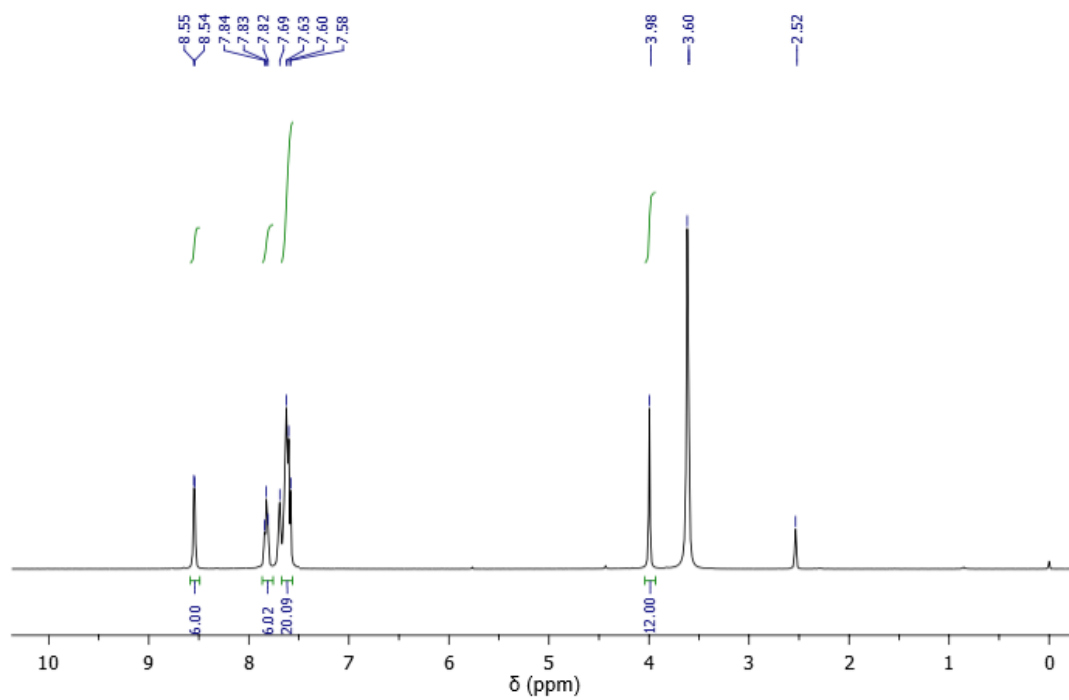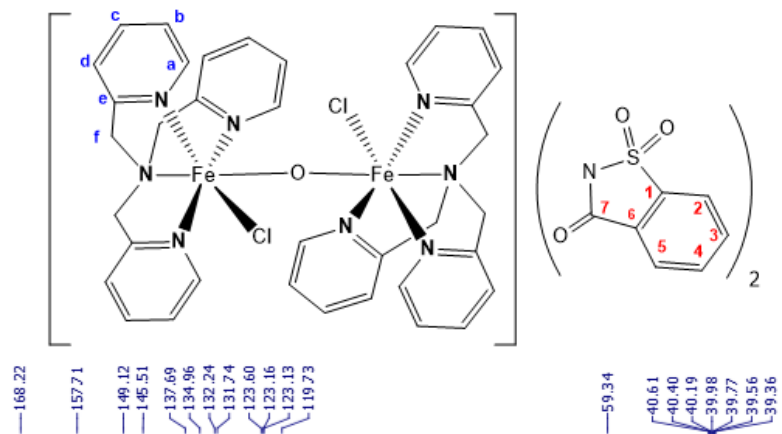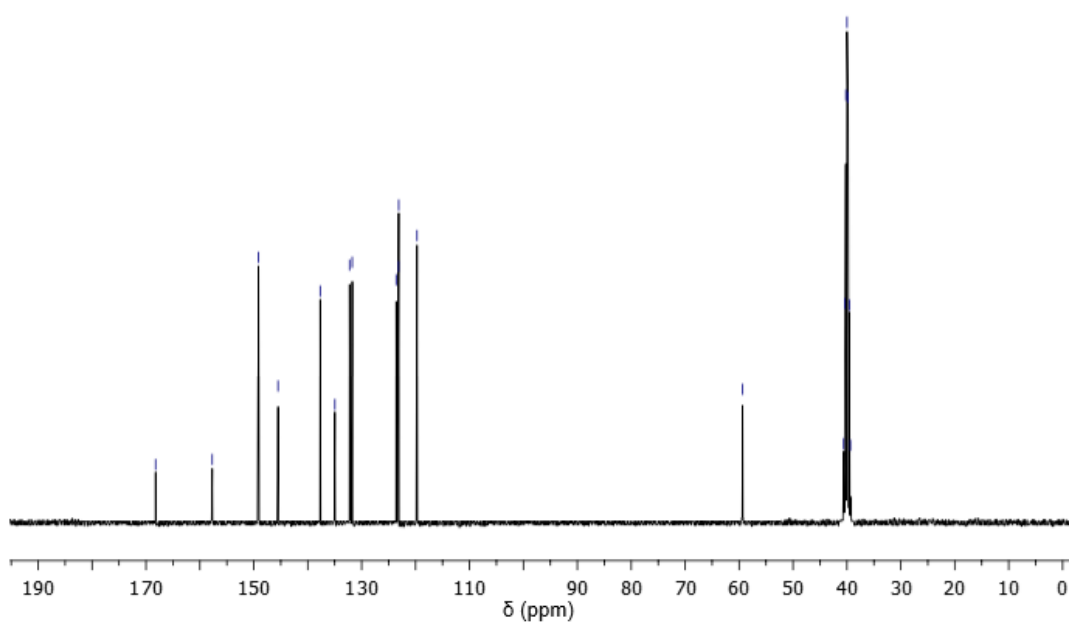

Fig. S4 continued

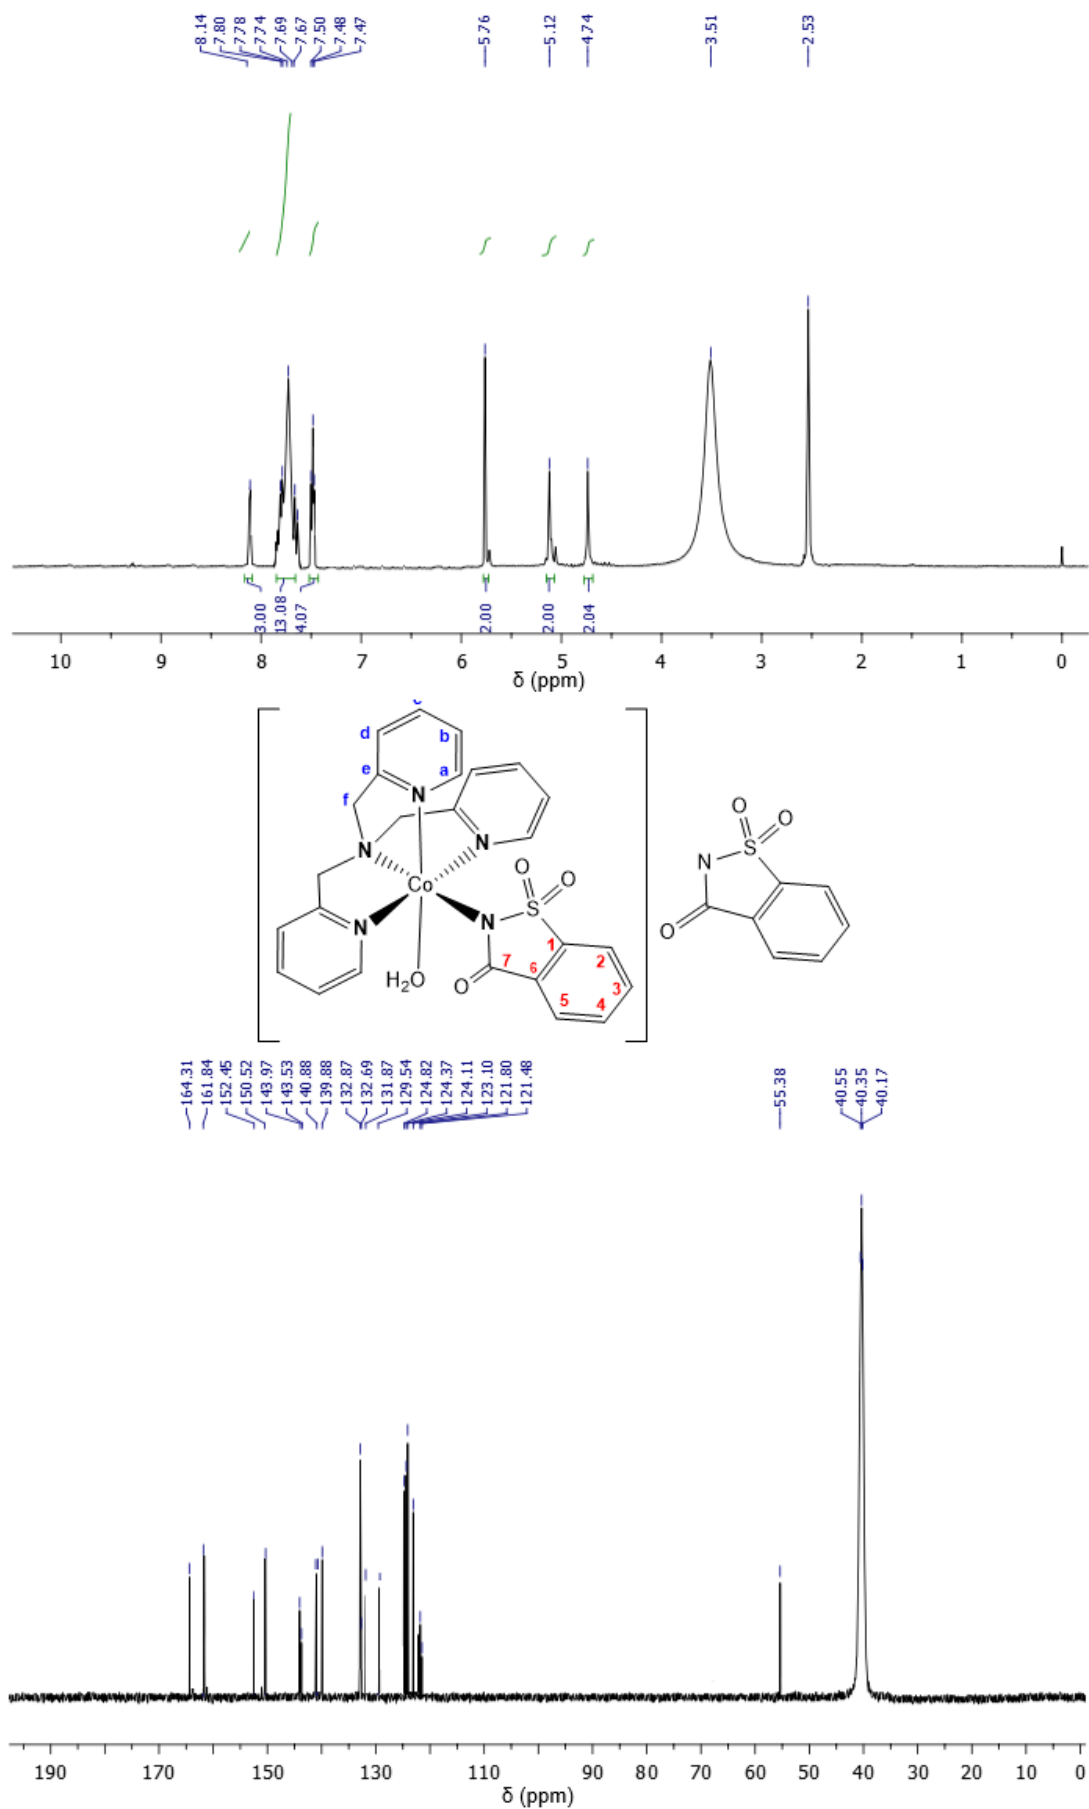

**Fig. S4 continued**

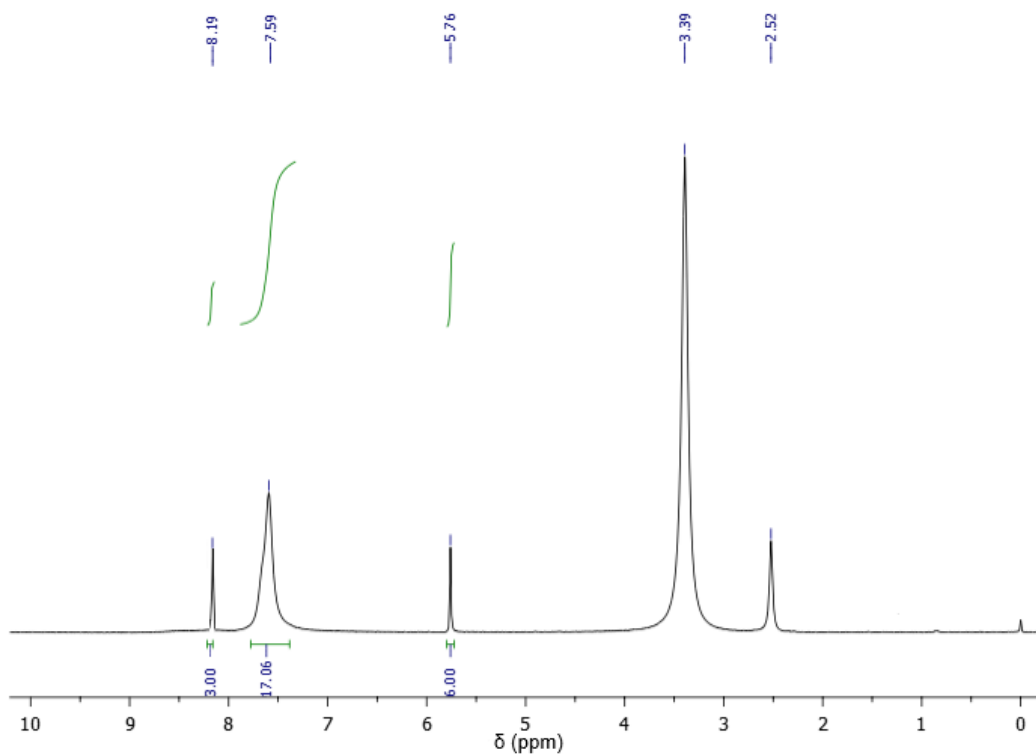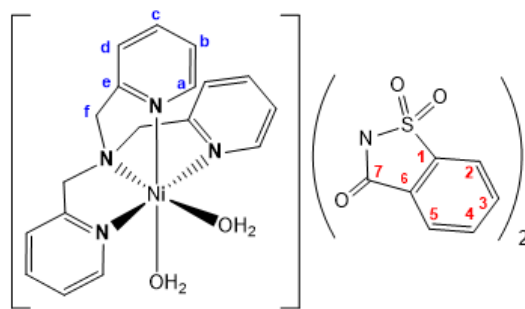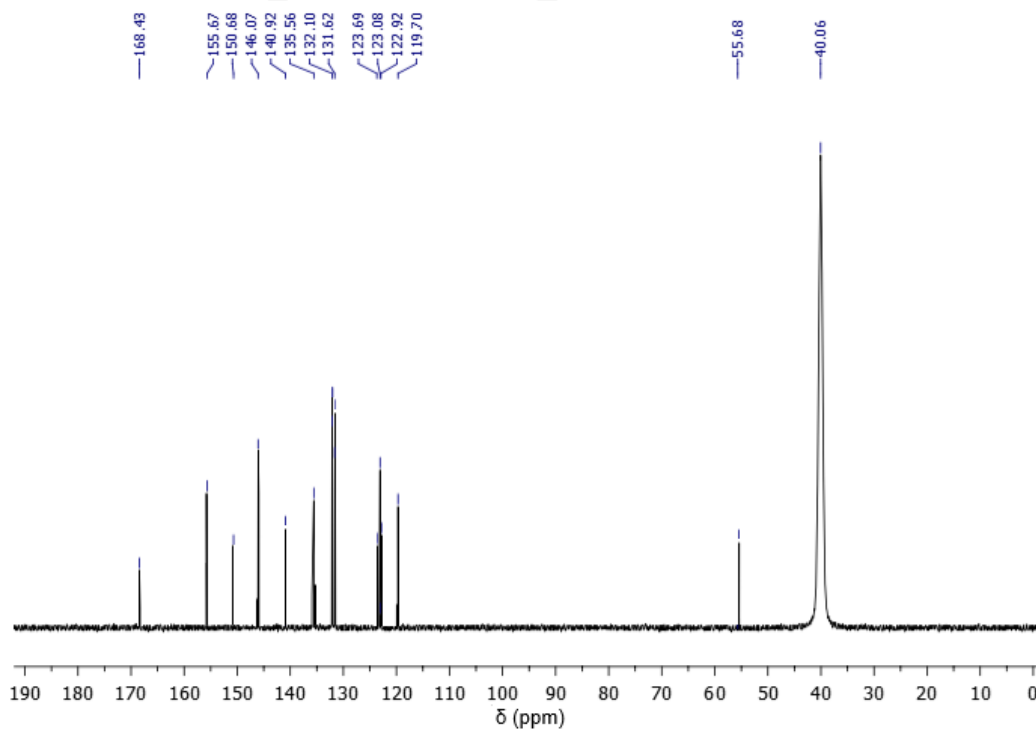

Fig. S4 continued

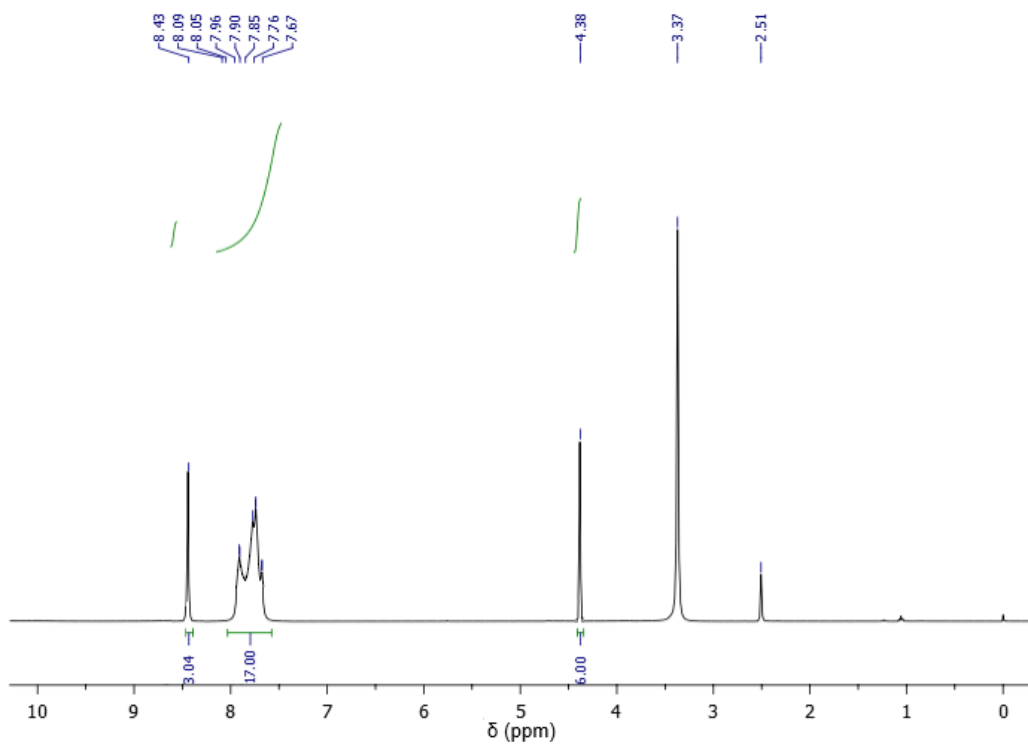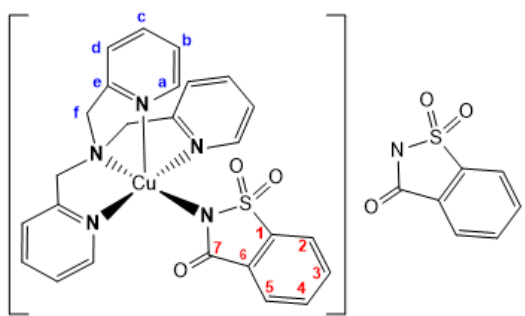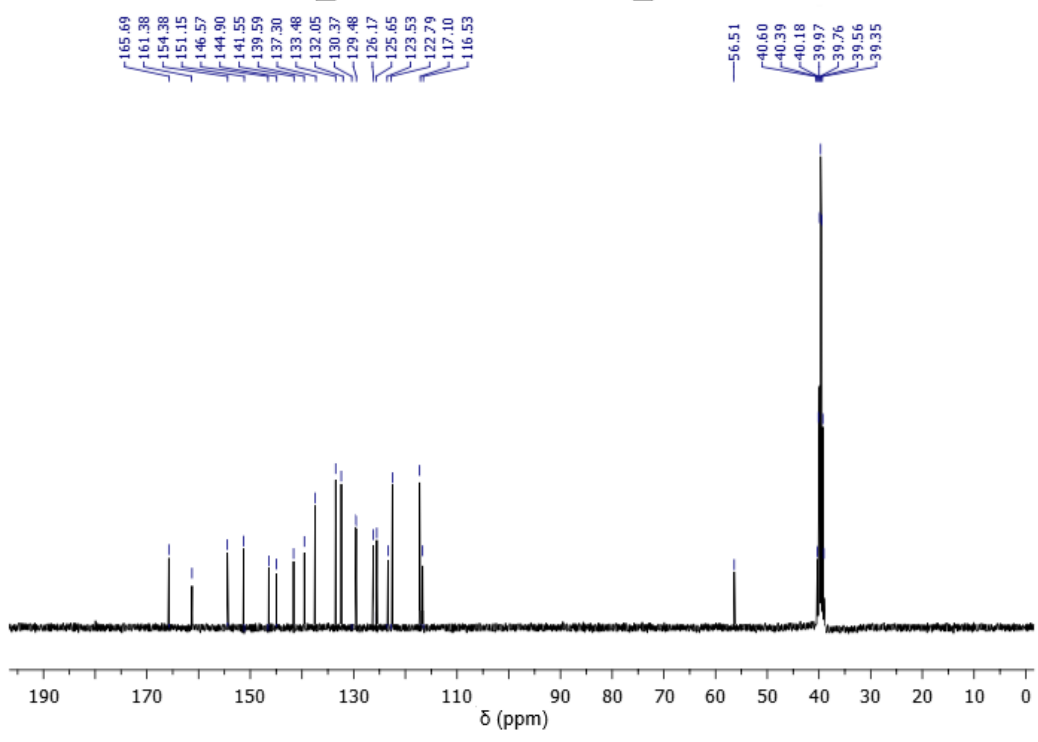

Fig. S4 continued

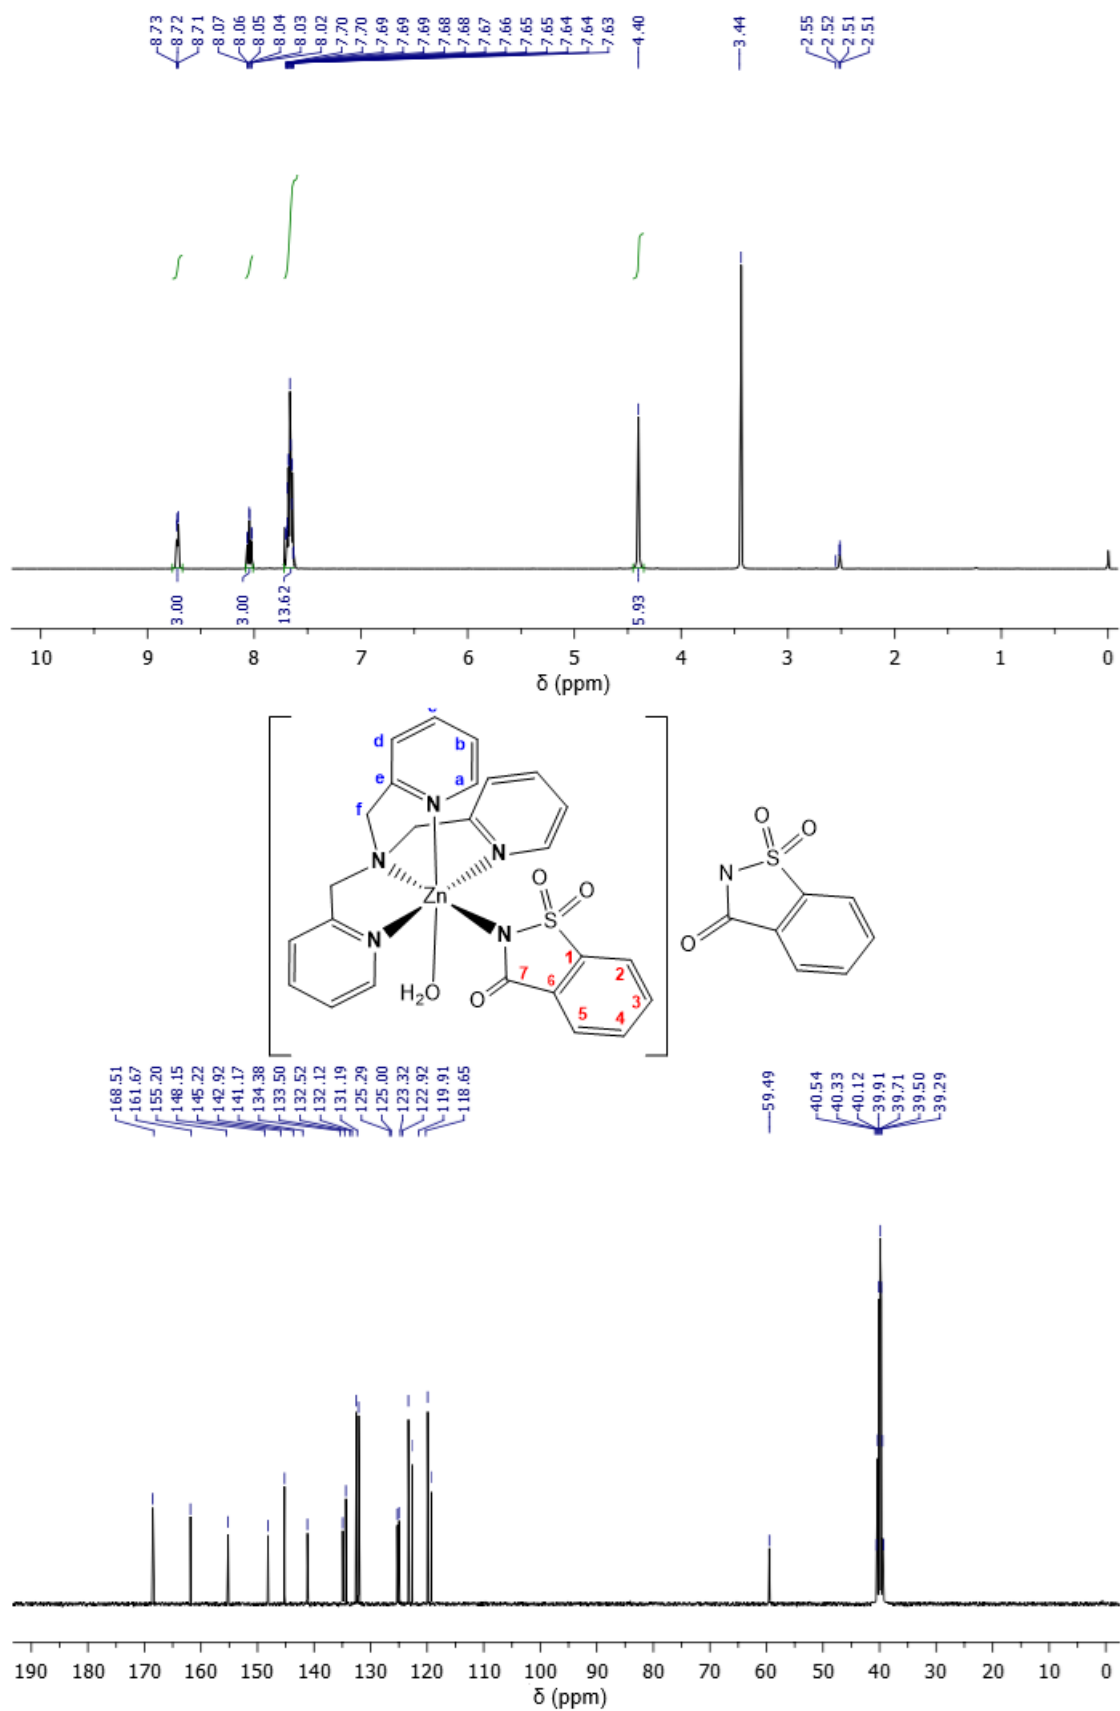

**Fig. S4**  $^1\text{H}$  NMR and  $^{13}\text{C}$  spectra of metal sac complex of tpma.

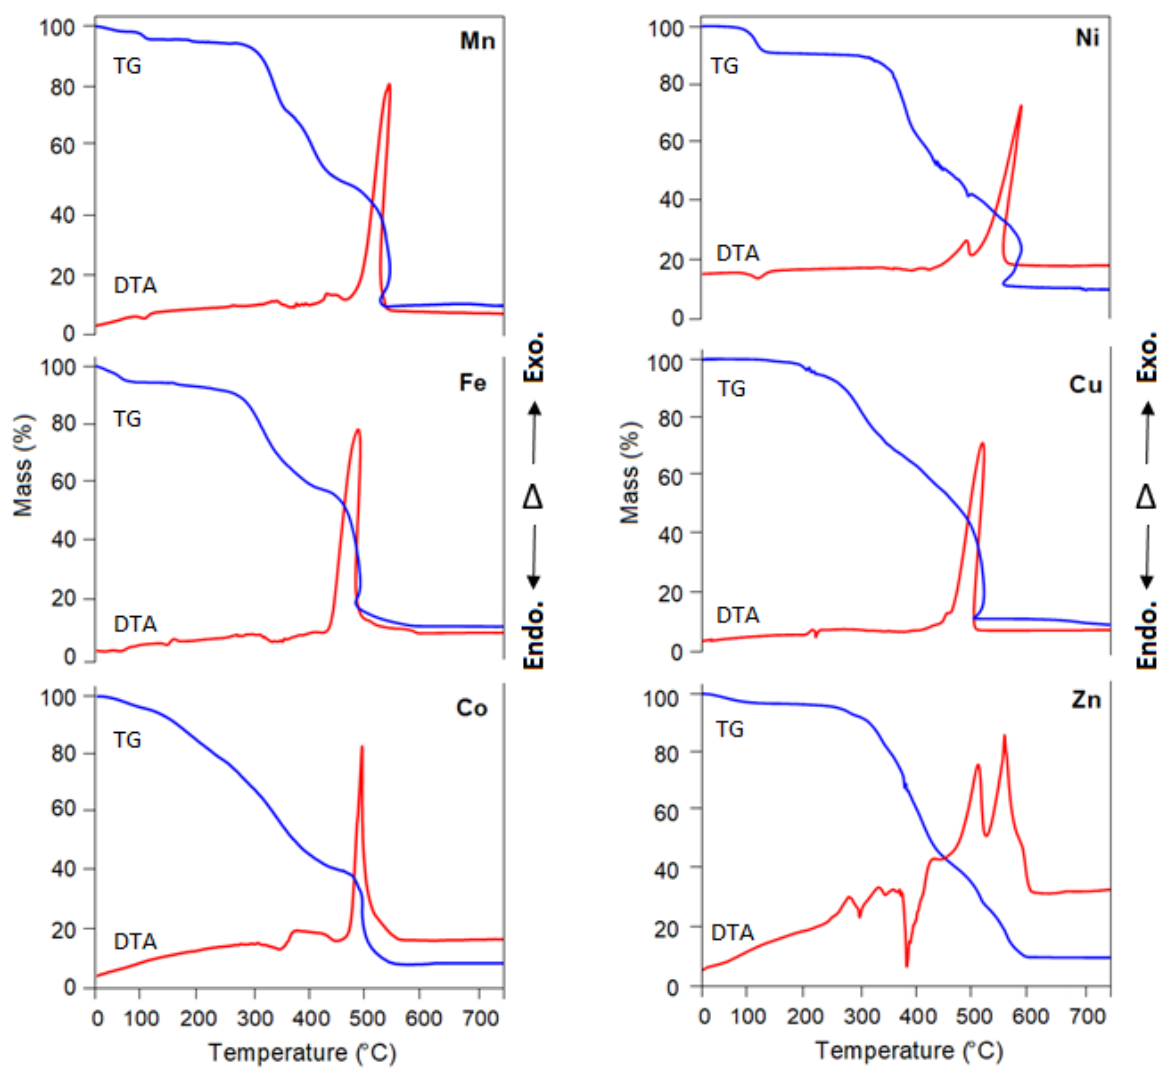

**Fig. S5** Thermal analysis curves of metal sac complexes of tpma.



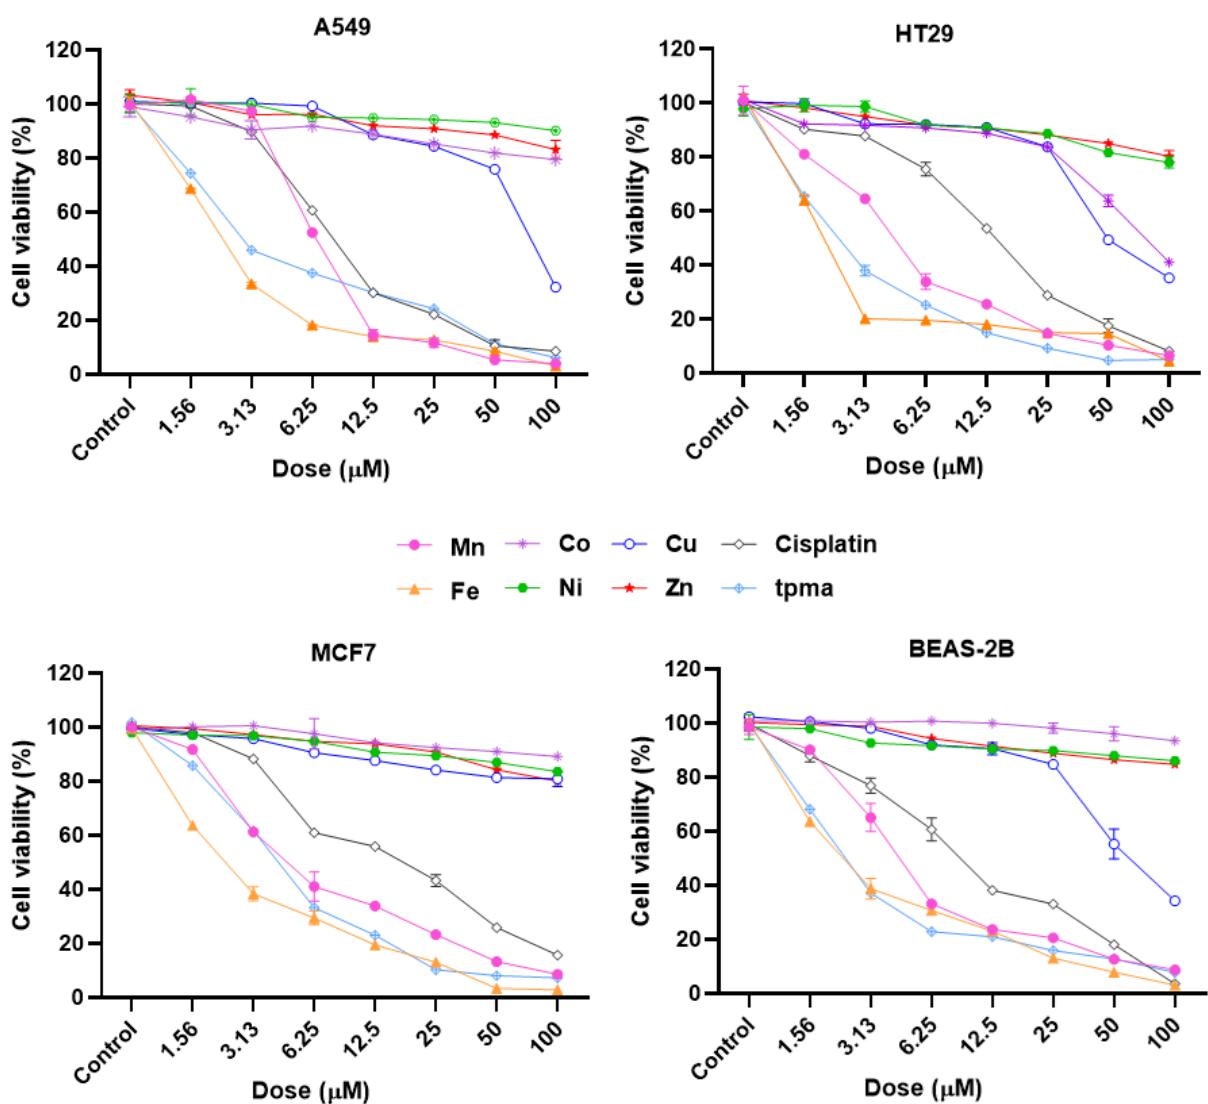

**Fig. S6** The dose-response graphics for the tpma ligand, the metal sac complexes of tpma and cisplatin obtained from SRB assay, the viability of cell lines after 48 h of treatment. Results are represented as mean  $\pm$  standard deviation ( $n = 3$ ).

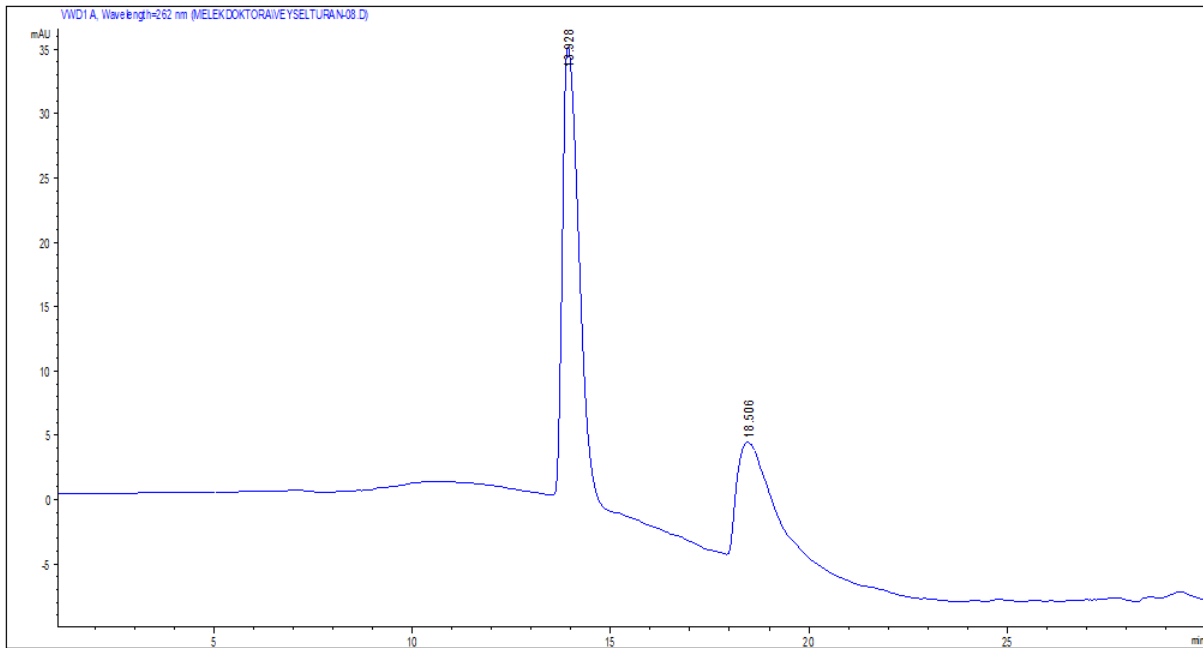

**Fig. S7** The HPLC chromatogram of **Fe** (100  $\mu$ M) dissolved in an aqueous solution of MeOH (1;1, v:v). The mobile phase consists of water containing 0.1% acetic acid (solvent A), and acetonitrile-water mixture with 0.1% acetic acid (v:v, 1:1, solvent B). Gradient conditions: at 0 min, 95% solvent A and 5% solvent B, and at 25 min, 10% A and 90% B. The total run time is 30 min at 262 nm.

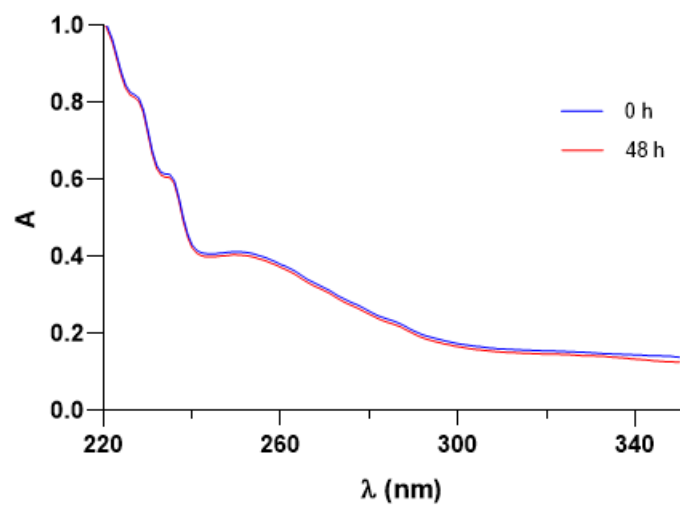

**Fig. S8** Time-dependent UV-Vis spectra of 10 μM solution of **Fe** in saline.

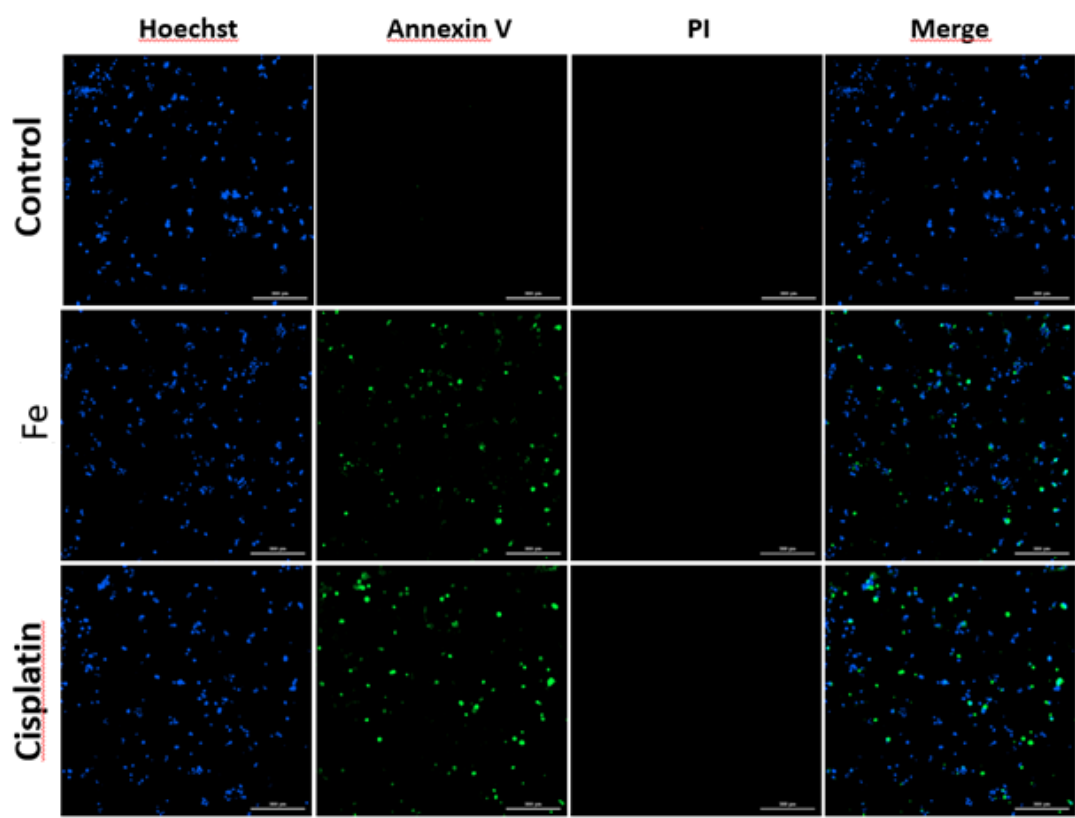

**Fig. S9** Hoechst staining (blue) and Annexin V/PI staining (green/red) to detect apoptosis cells in **Fe** and cisplatin. HT29 cells were treated with IC<sub>75</sub> doses of **Fe** (3  $\mu$ M) and cisplatin (33.2  $\mu$ M) at 12 h. Merge is Hoechst staining/Annexin V/PI staining overlay. Magnification  $\times 10$ . The scale bar is 300  $\mu$ m.

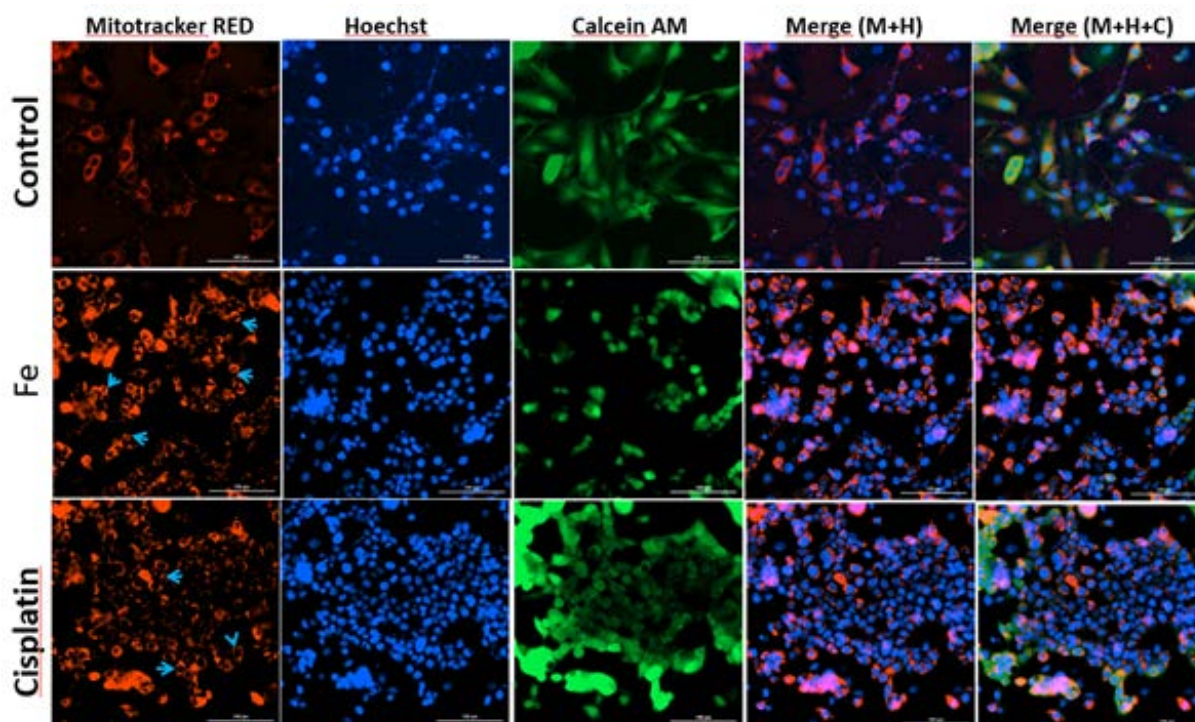

**Fig. S10** HT29 cells were incubated with Mitotracker (red), Calcein AM (green), and Hoechst 33342 (blue) and imaged using an inverted fluorescent microscope (magnification  $\times 40$ ). Mitotracker red staining reveals that **Fe** and cisplatin-treated HT29 cells display defects in mitochondrial morphology compared to control at 12 h. Representative images show the presence of large globular aggregates (blue arrows) in **Fe** and cisplatin-treated HT29 cells. Merge is Hoechst /Calcein AM/Mitotraker RED staining overlay. The scale bar is 100  $\mu\text{m}$ .

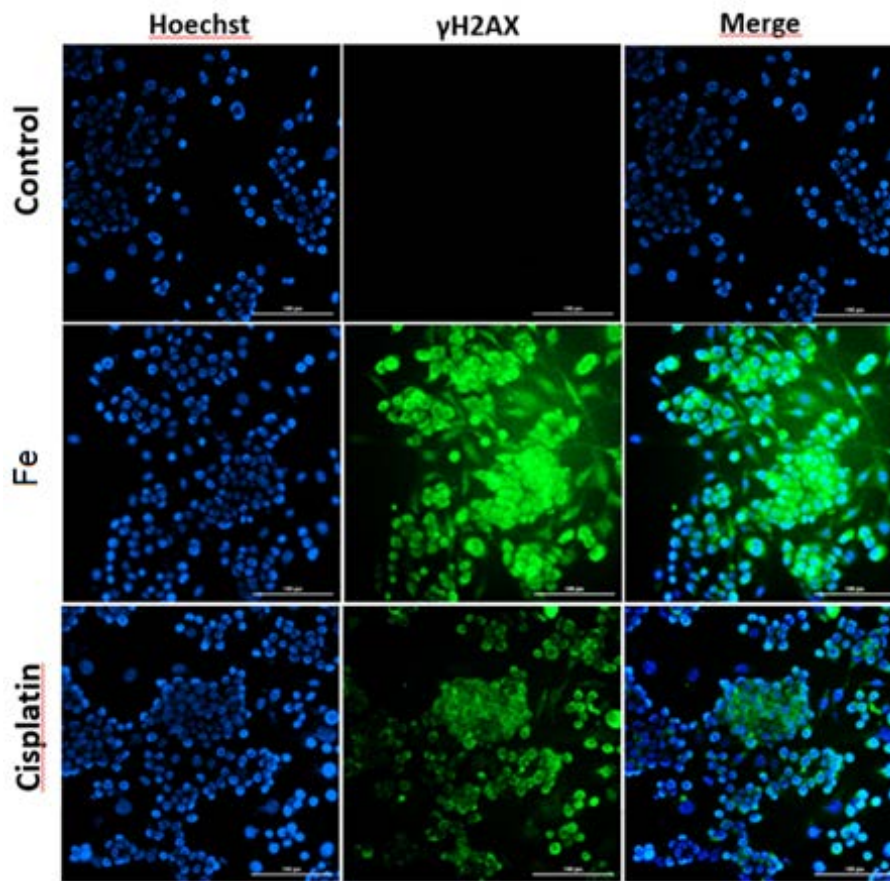

**Fig. S11** Representative microscopy images from HT29 cells treated with Fe and cisplatin for 12h. Each treated cells were fixed and processed for  $\gamma$ -H2AX immunofluorescent staining.  $\gamma$ -H2AX staining is green; nuclei are stained with DAPI blue.  $\gamma$ -H2AX expression was detected in HT29 cells treated with Fe and cisplatin but not in control cells. Magnification:  $\times 40$ . Merge is Hoechst/ $\gamma$ -H2AX staining overlay. The scale bar is 100  $\mu\text{m}$ .
